# Supplementary material for: Aligning a New Reference Genetic Map of Lupinus angustifolius with the Genome Sequence of the Model Legume, Lotus japonicus
Source: PubMed Central journal article supplement — DNA Res. 2010 Feb 4;17(2):73–83. doi: 10.1093/dnares/dsq001 (PMC2853381; doi:10.1093/dnares/dsq001), 2010-02-04
Supplement: dsq001_1.pdf [file dsq001_1.pdf]

## Supplementary Legends

**Supplementary Table S1.** Simple sequence repeat (SSR) and amplified fragment length polymorphism (AFLP) primer combinations giving rise to microsatellite-anchored fragment length polymorphism (MFLP) markers in *Lupinus angustifolius*.

**Supplementary Table S2.** Data file containing linkage group locations of 1090 mapped loci and 12 unlinked markers, details of BLASTn correspondences in *Lotus japonicus* chromosomes (Lj1 to Lj6), marker assay details and genotyping in recombinant inbred lines (A018 to A135).

**Supplementary Fig. S1.** A dense genetic linkage map of *Lupinus angustifolius* comprising 1090 loci in 20 linkage groups (NLL-01 to NLL-20) and three small clusters (Cluster-1 to Cluster-3). Loci on the left of each linkage group are 'framework' markers used to construct the linkage group. Loci on the right of each linkage group are 'attached' markers whose approximate location between flanking markers are shown. Locus positions are in Kosambi centiMorgans. Major gene trait loci are shown in bold text. Loci with significant correspondences in the *Lotus japonicus* genome are coloured according to the chromosome containing the most significant BLASTn correspondence value (see colour key).

# NLL-01

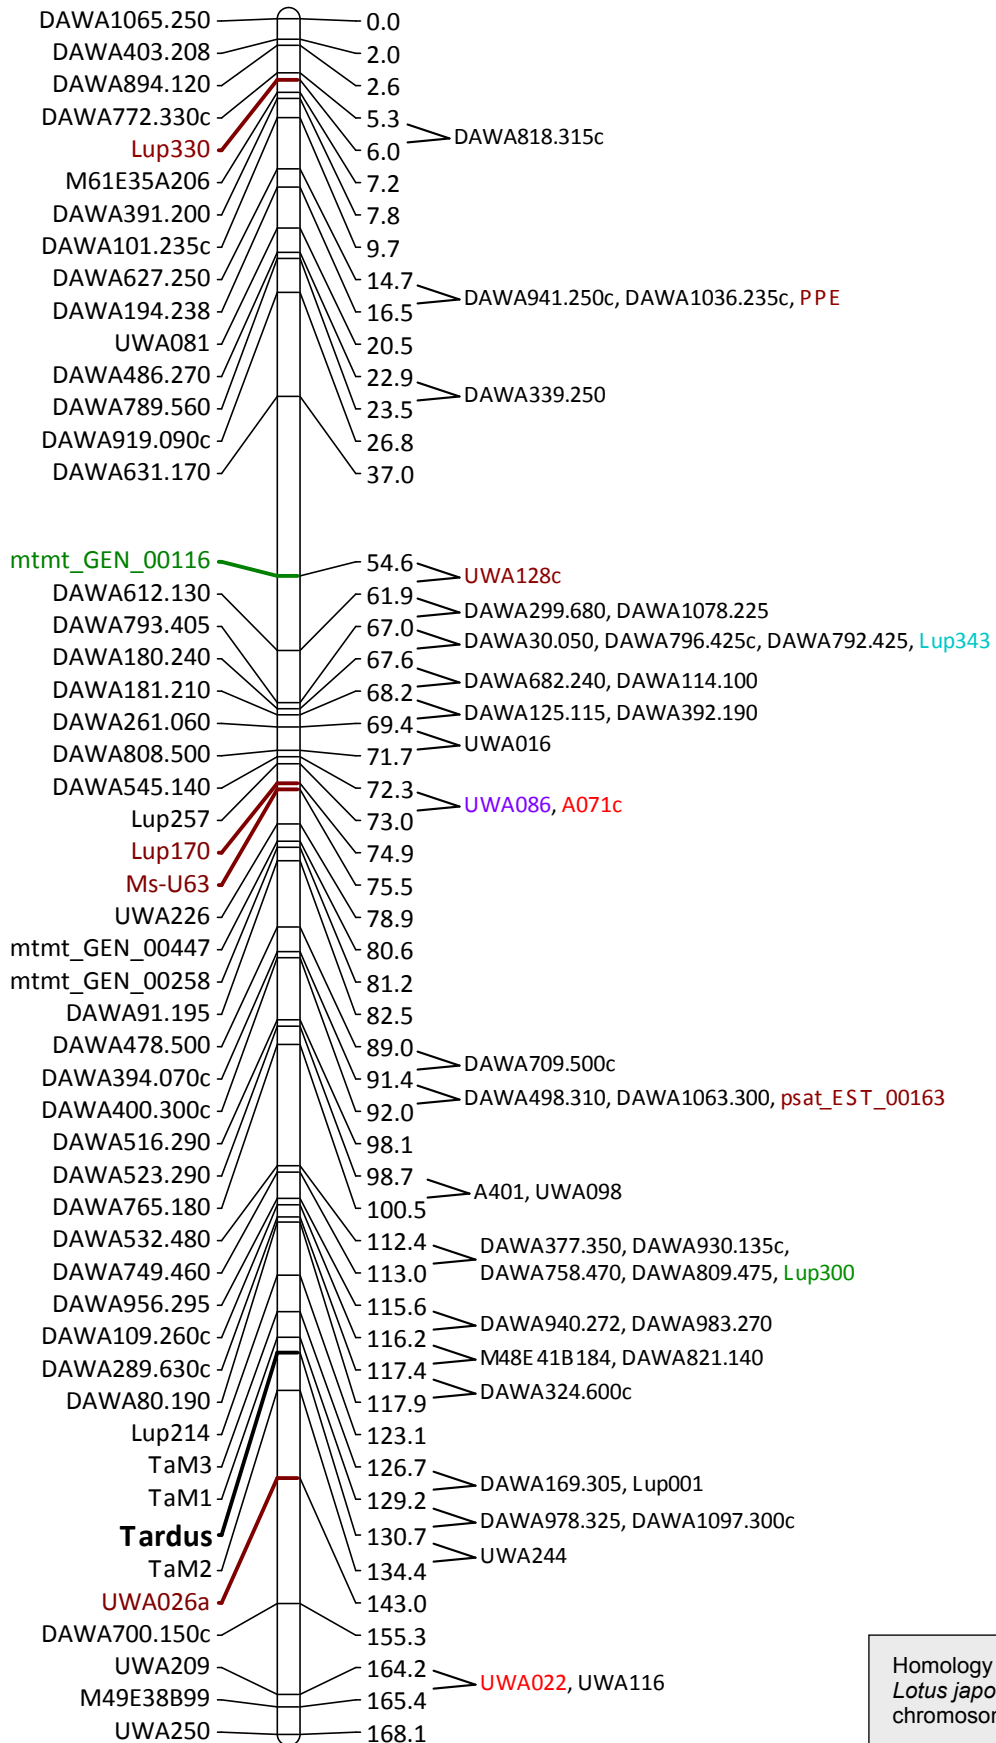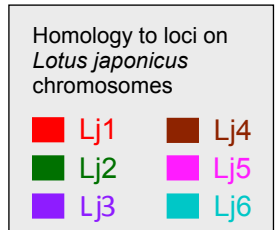

# NLL-02

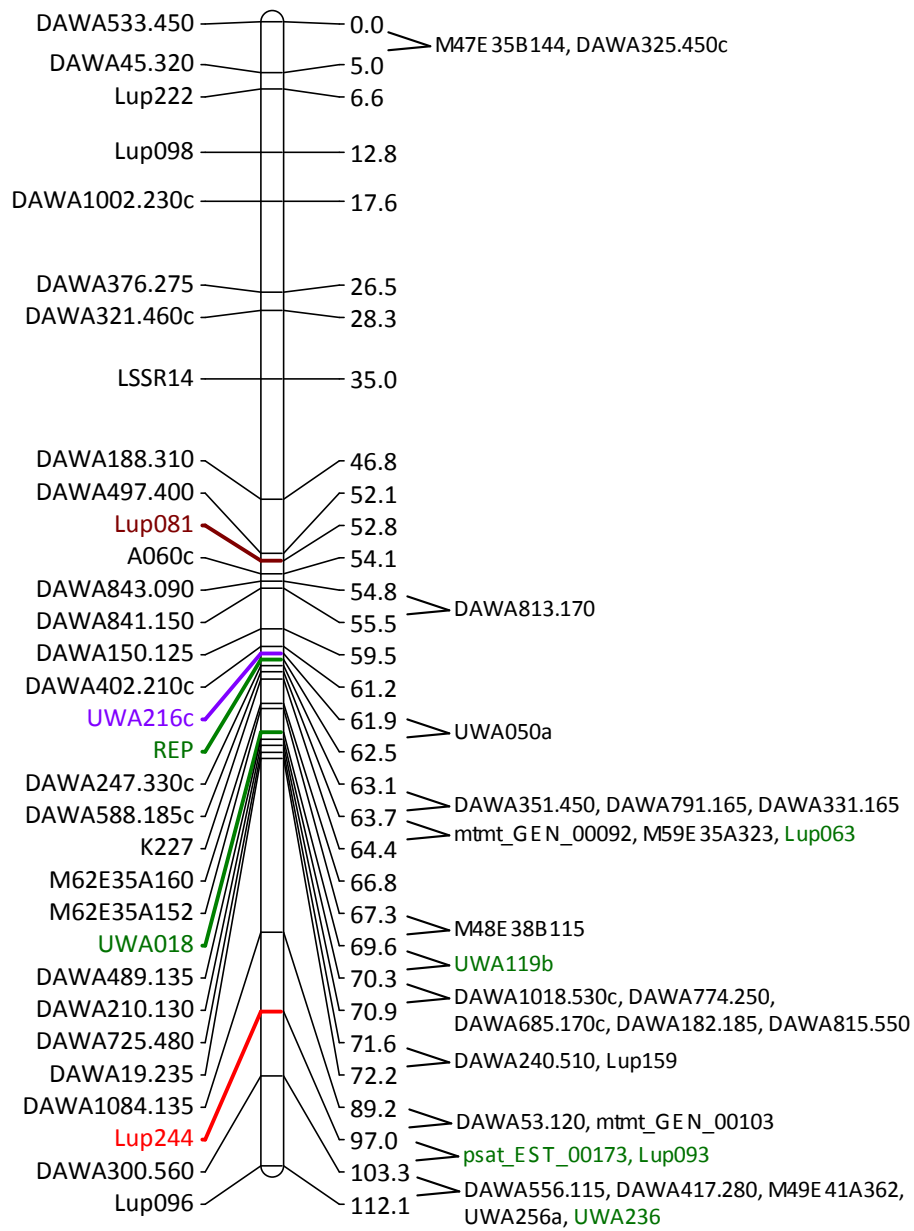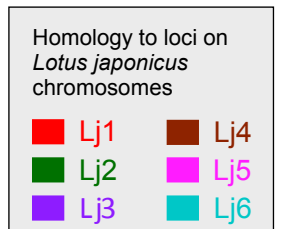

# NLL-03

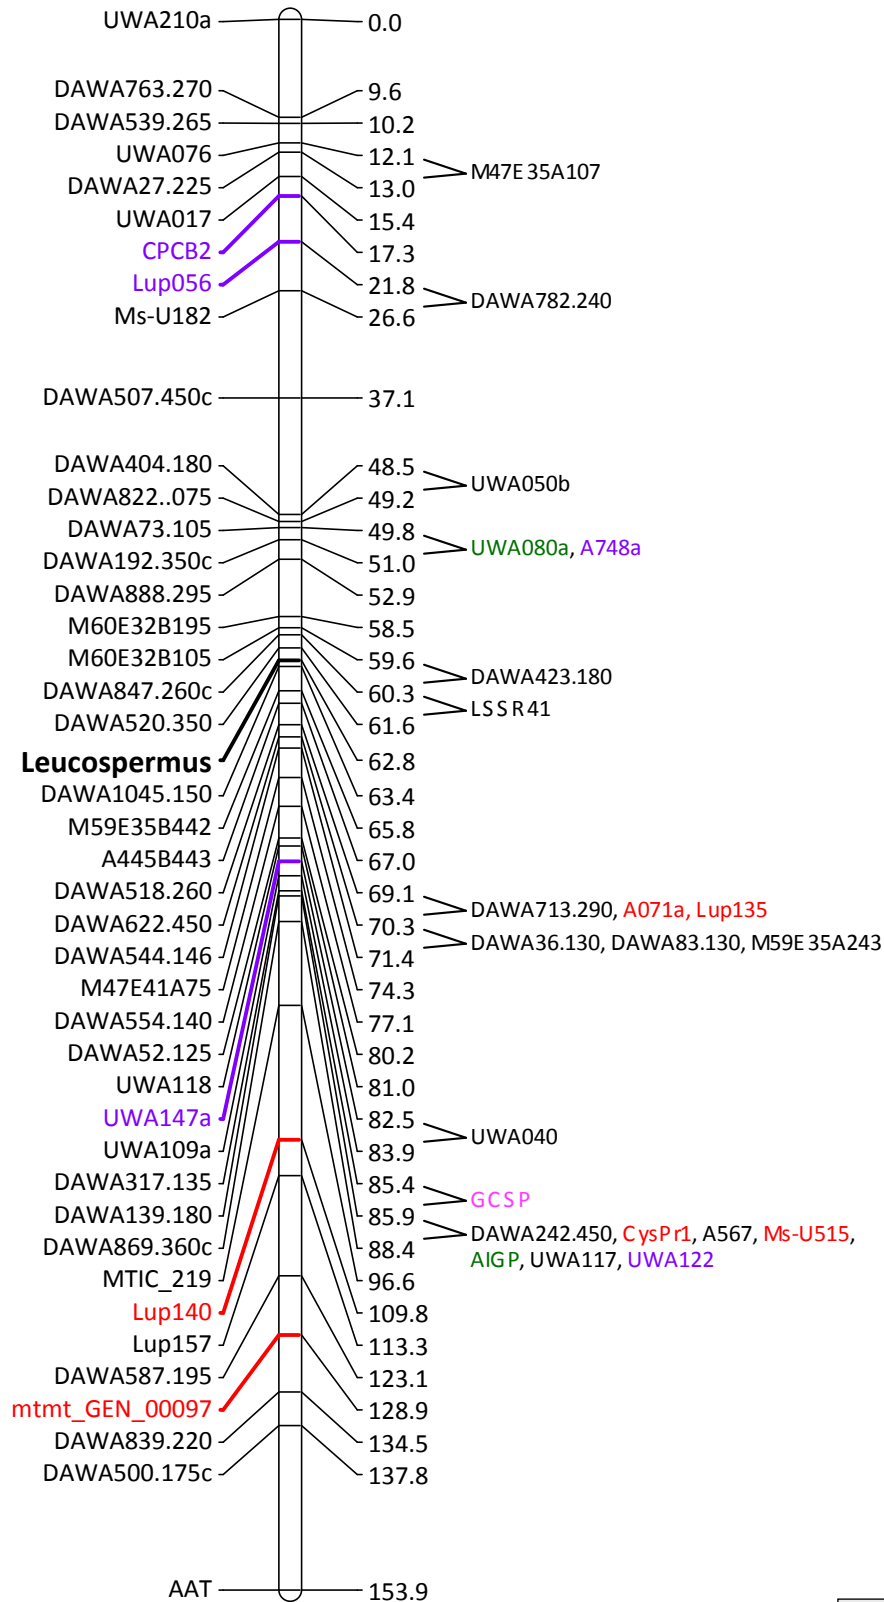

# NLL-04

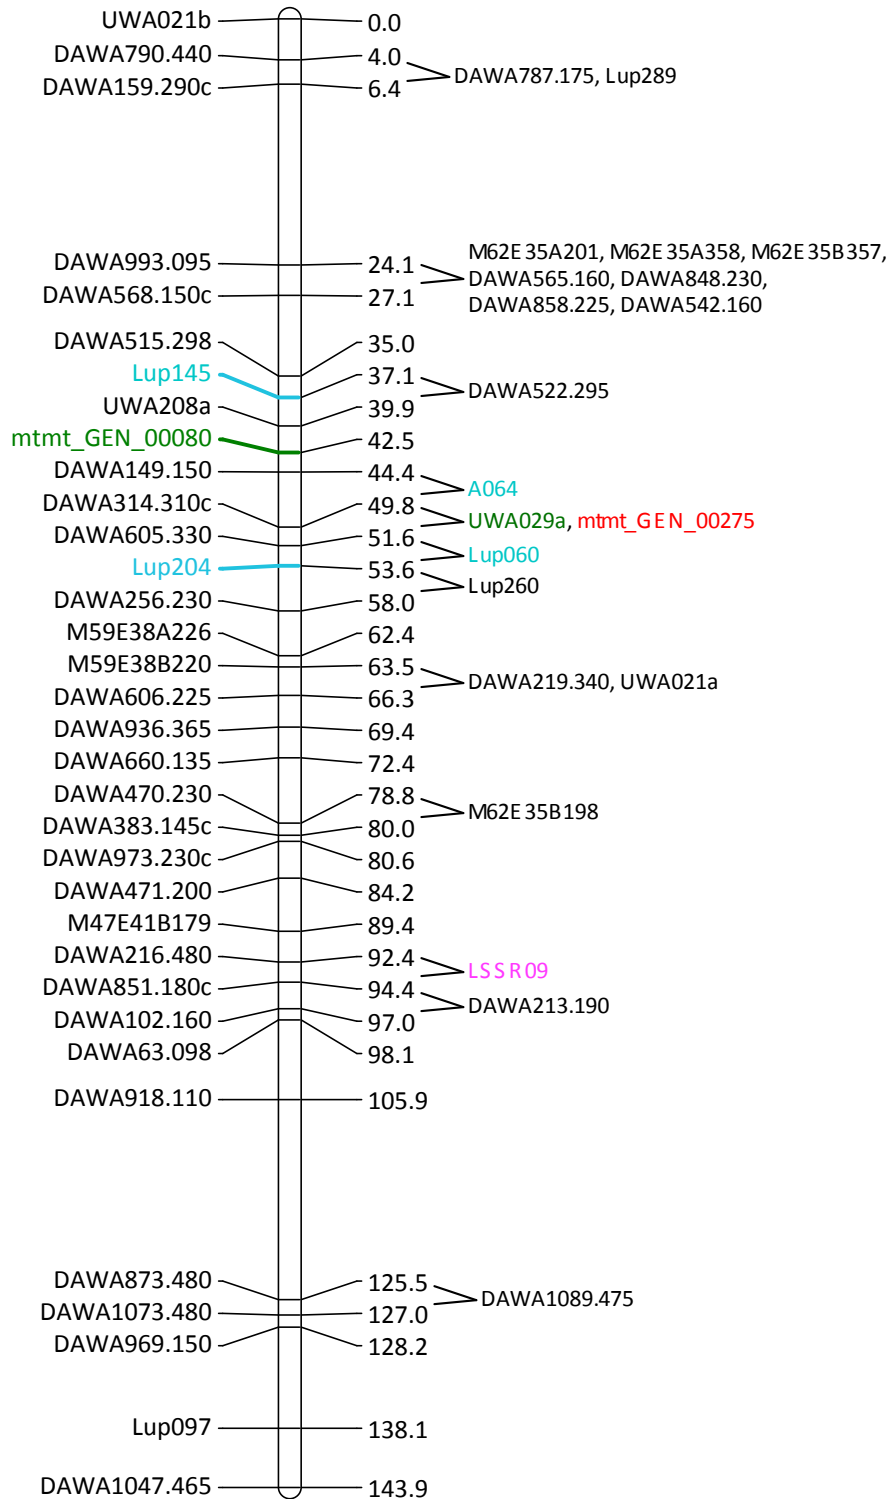

# NLL-05

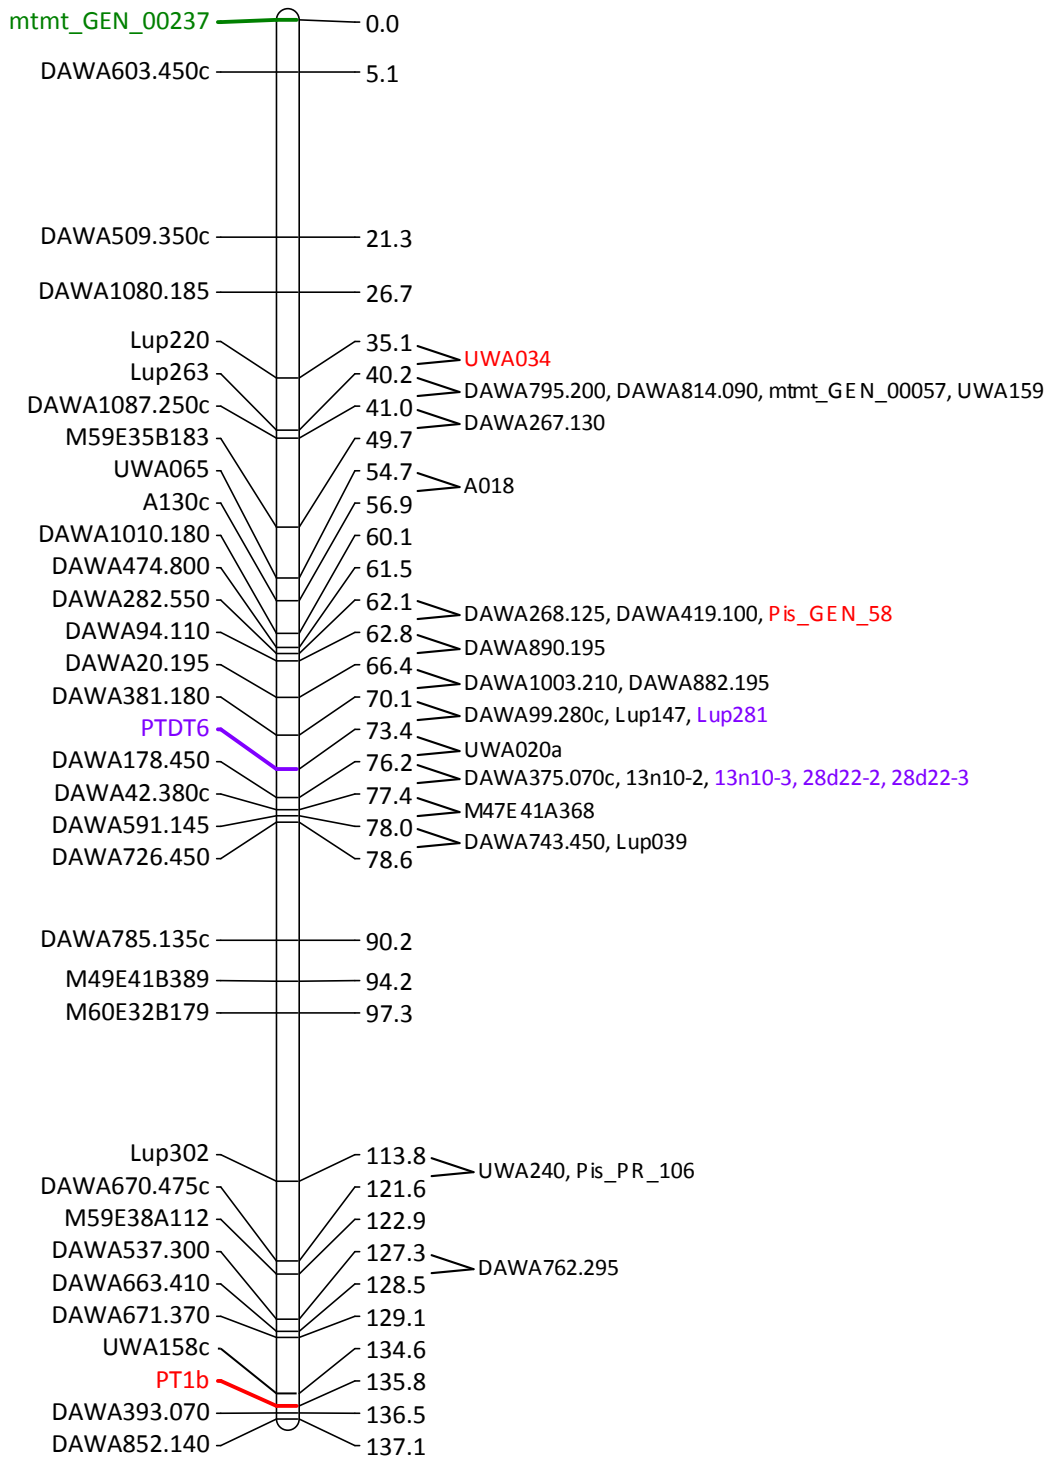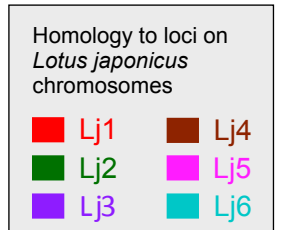

# NLL-06

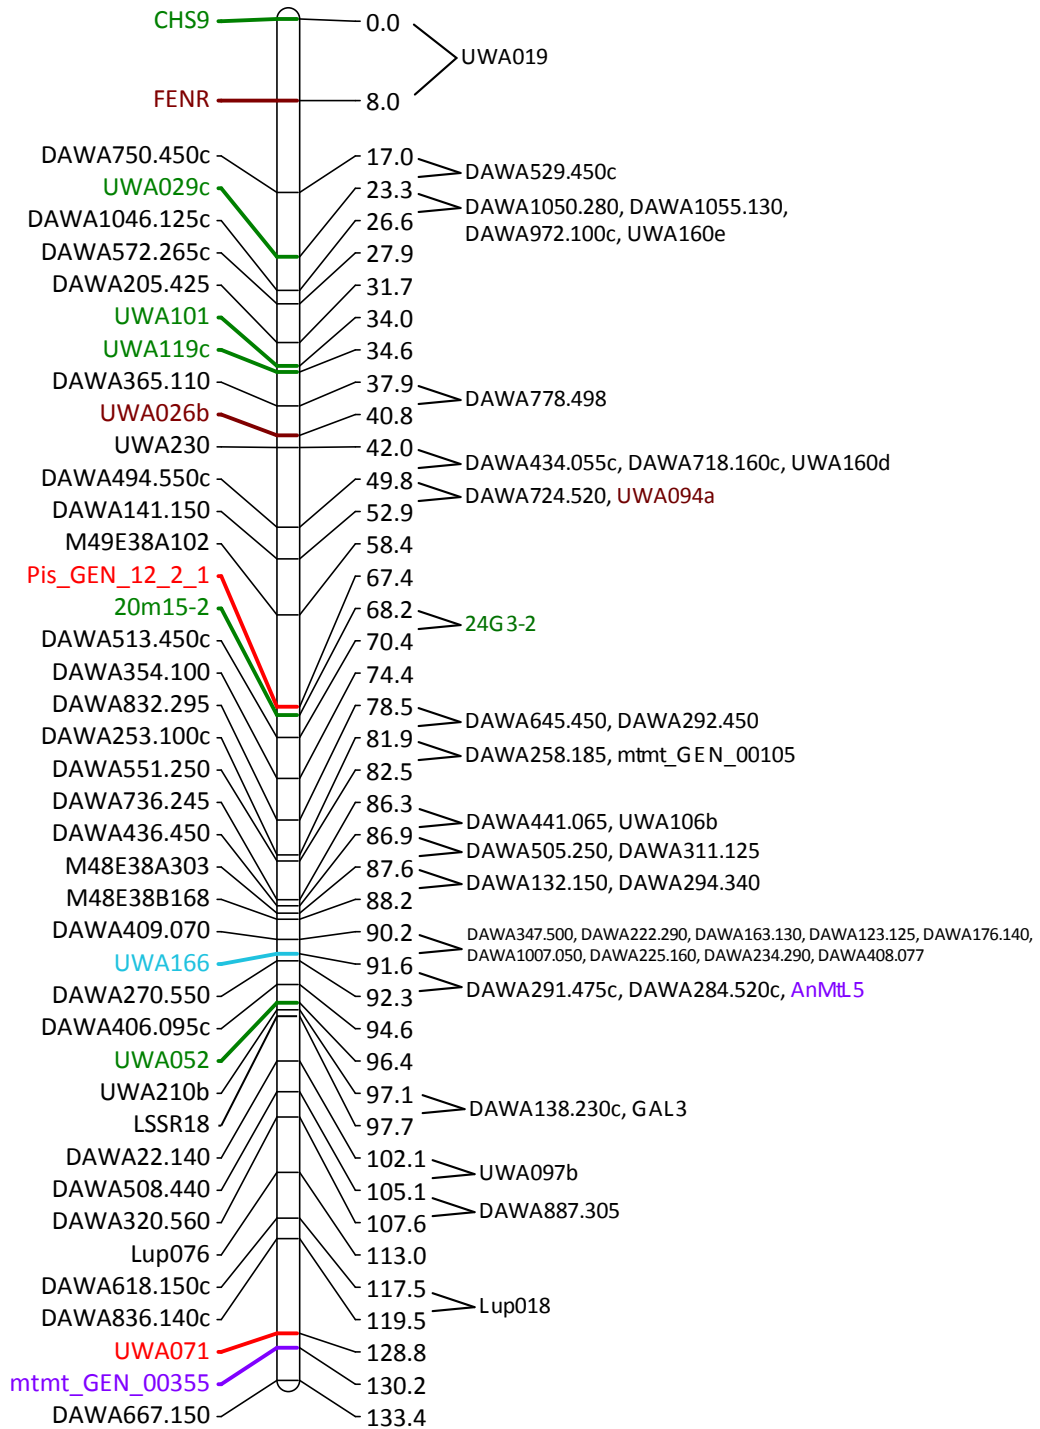

# NLL-07

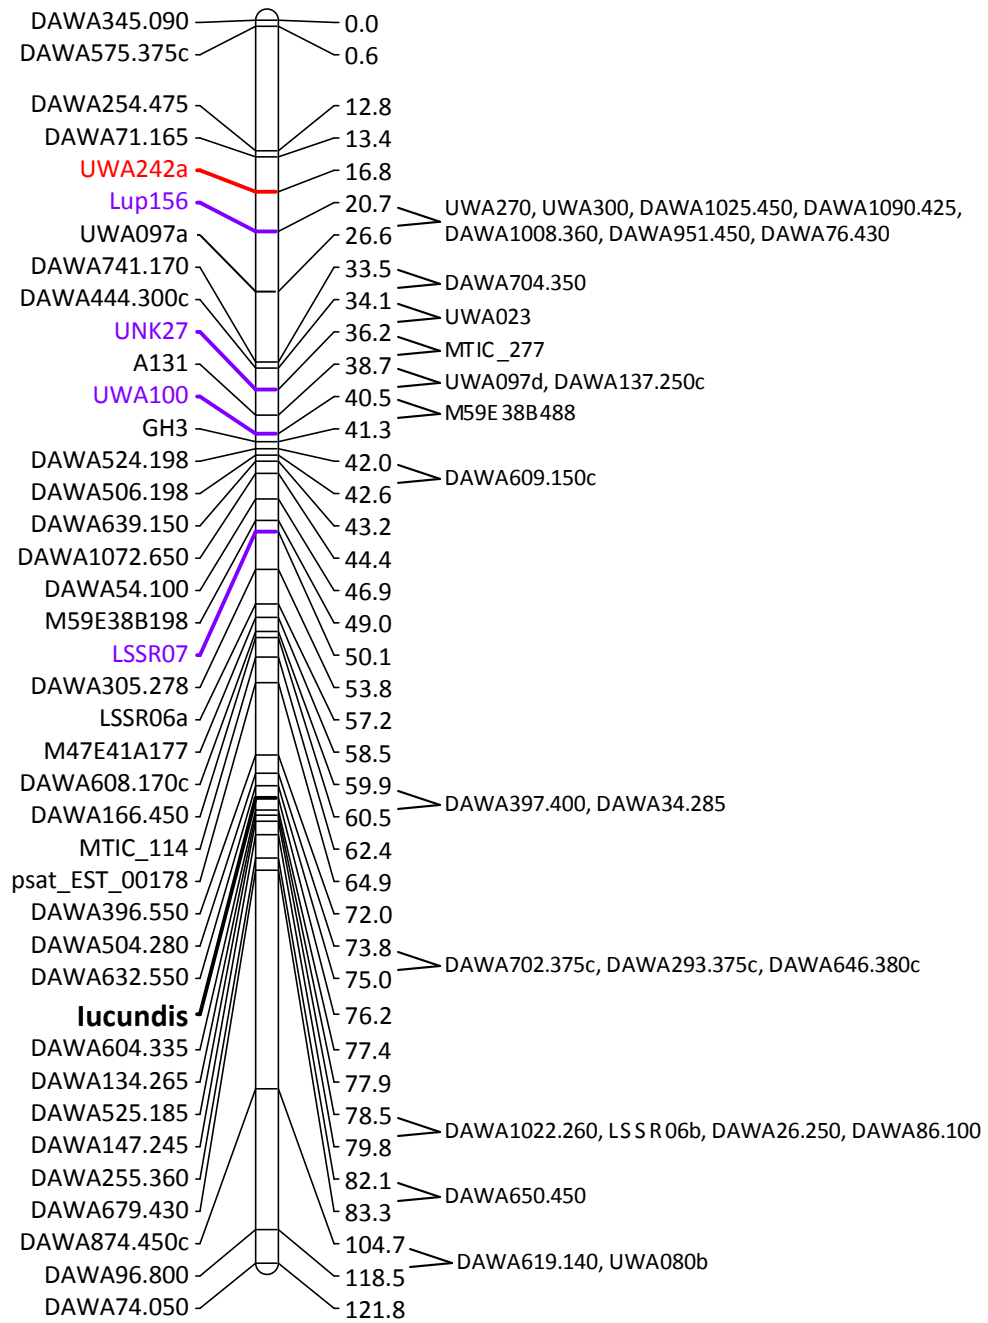



# NLL-08

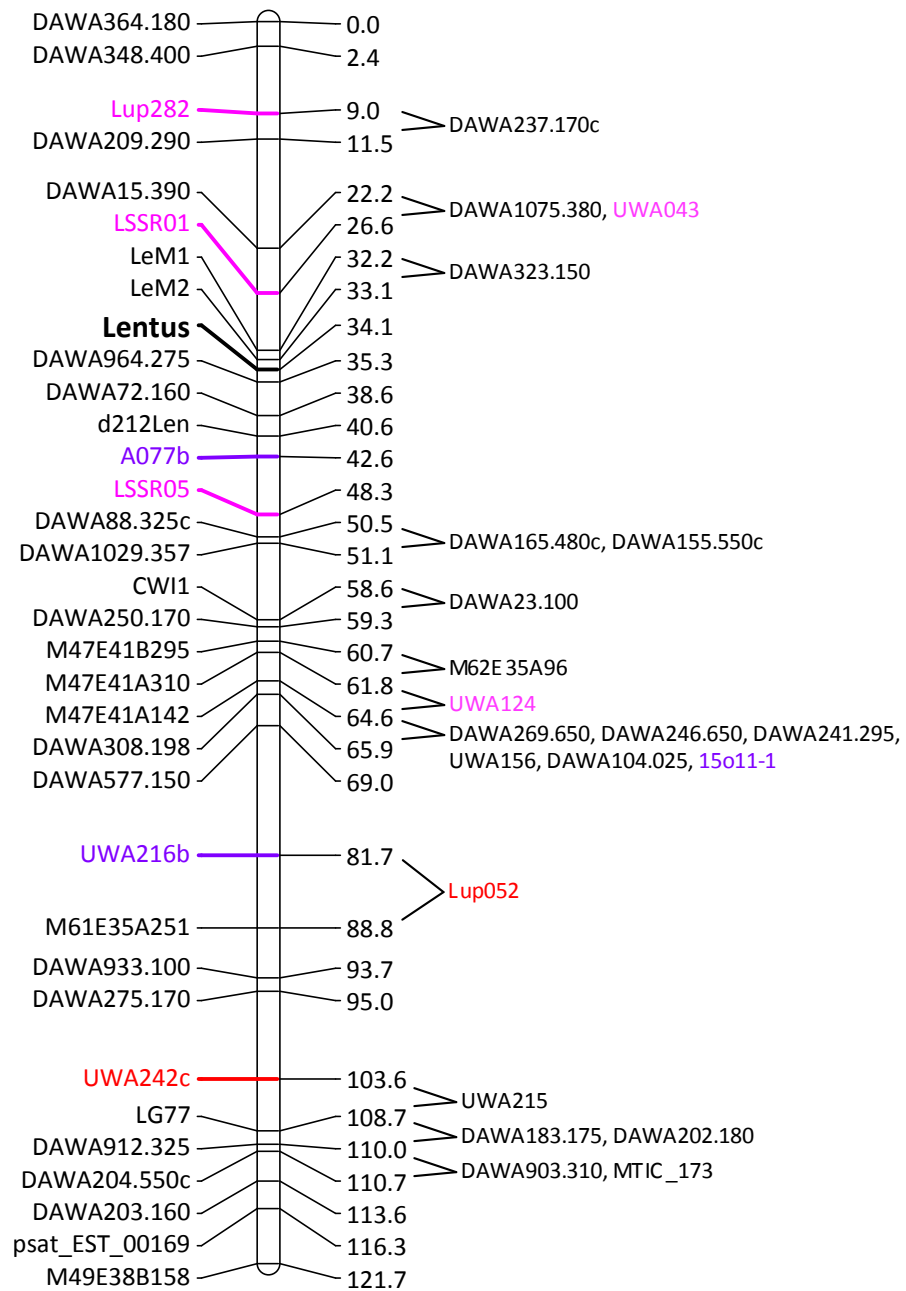

# NLL-09

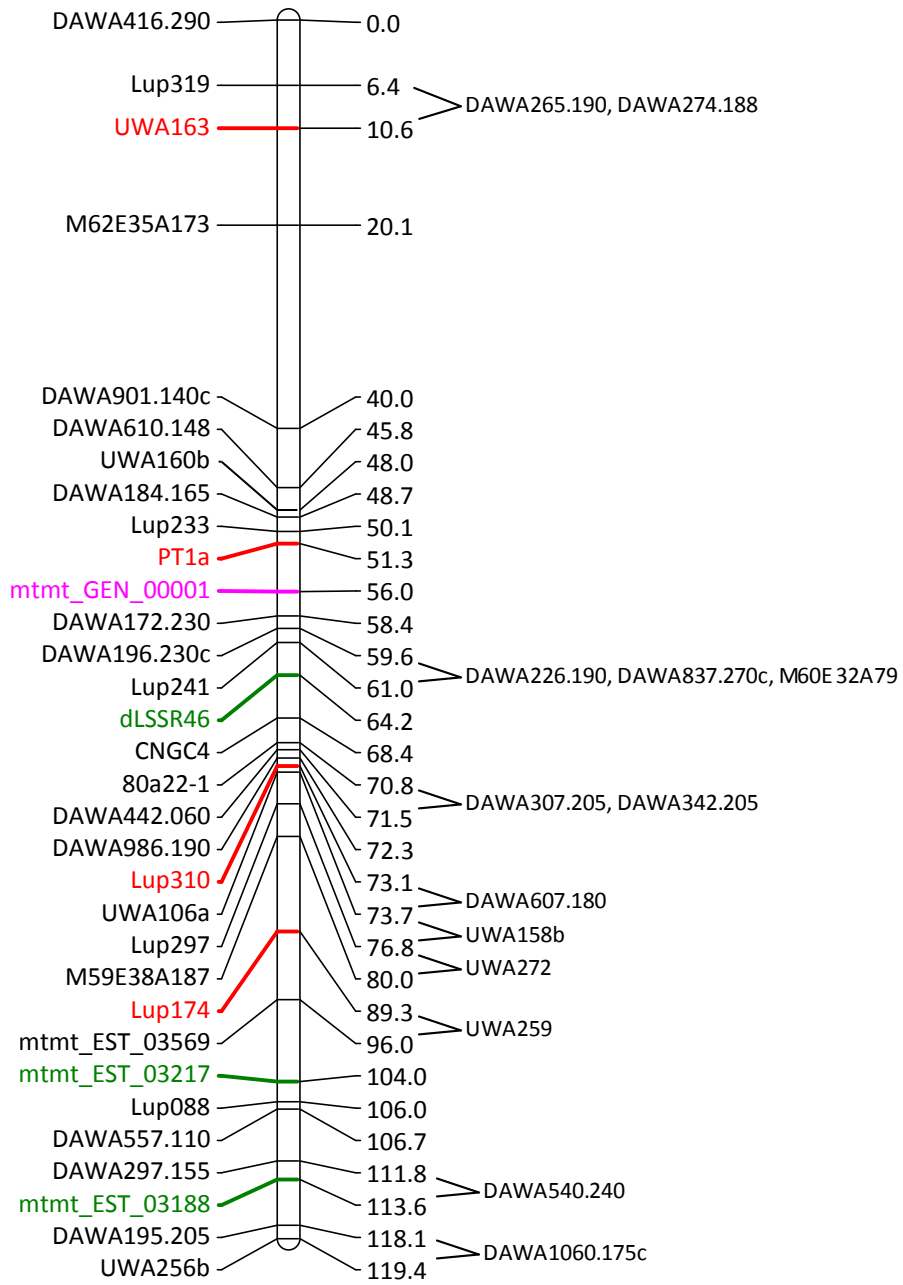

# NLL-10

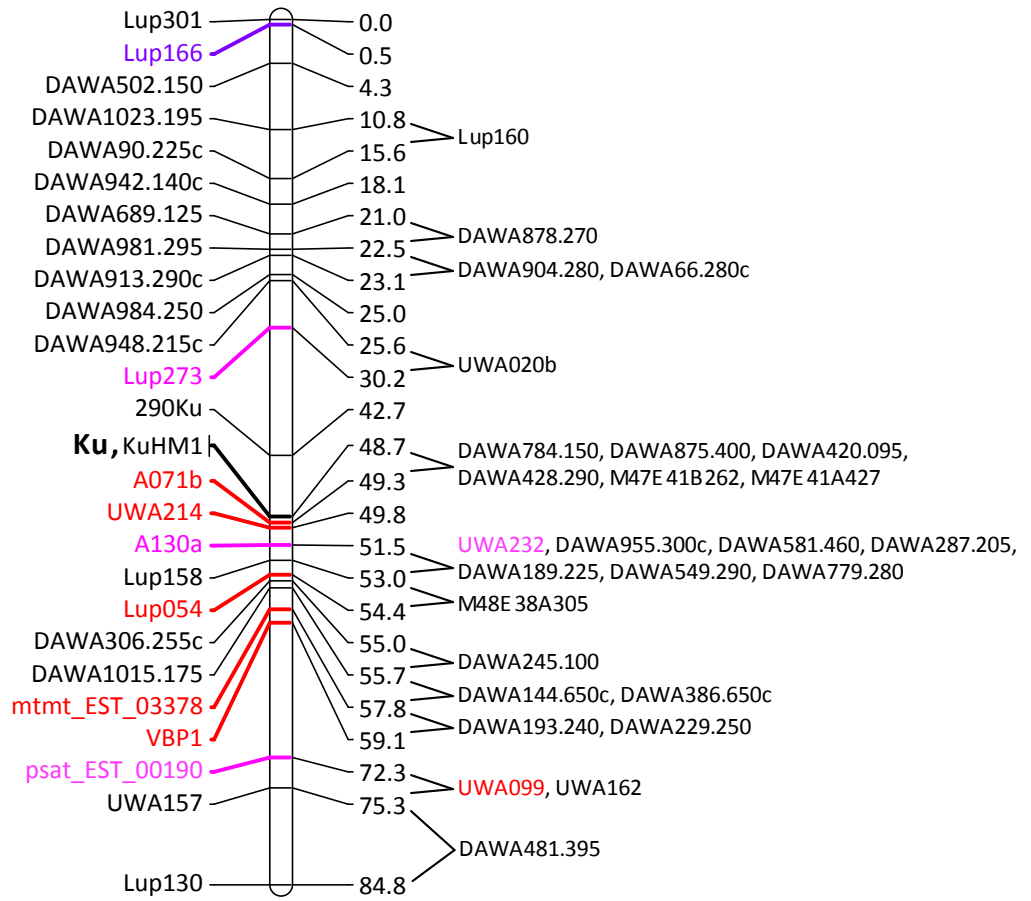

# NLL-11

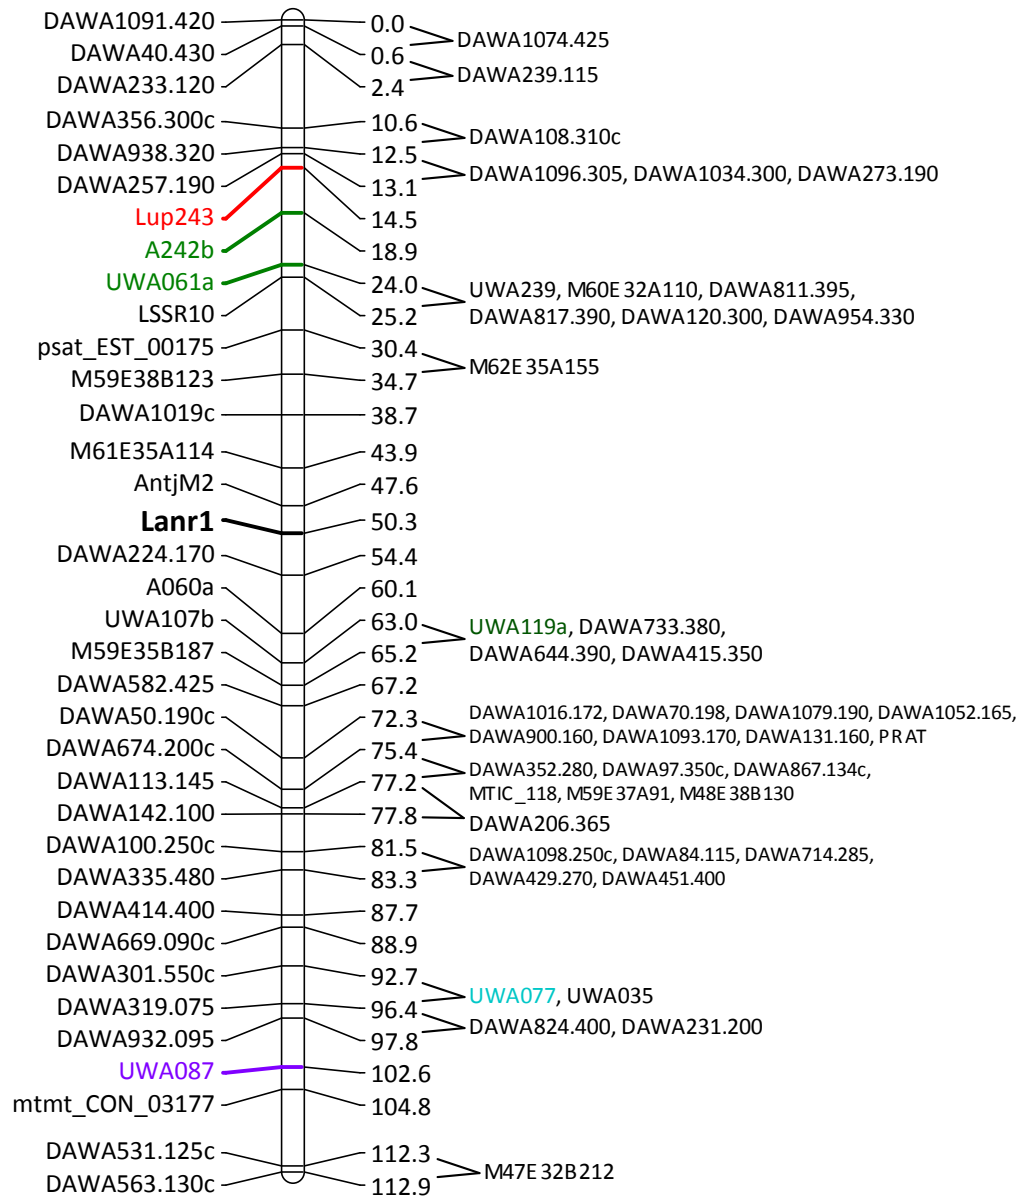

# NLL-12

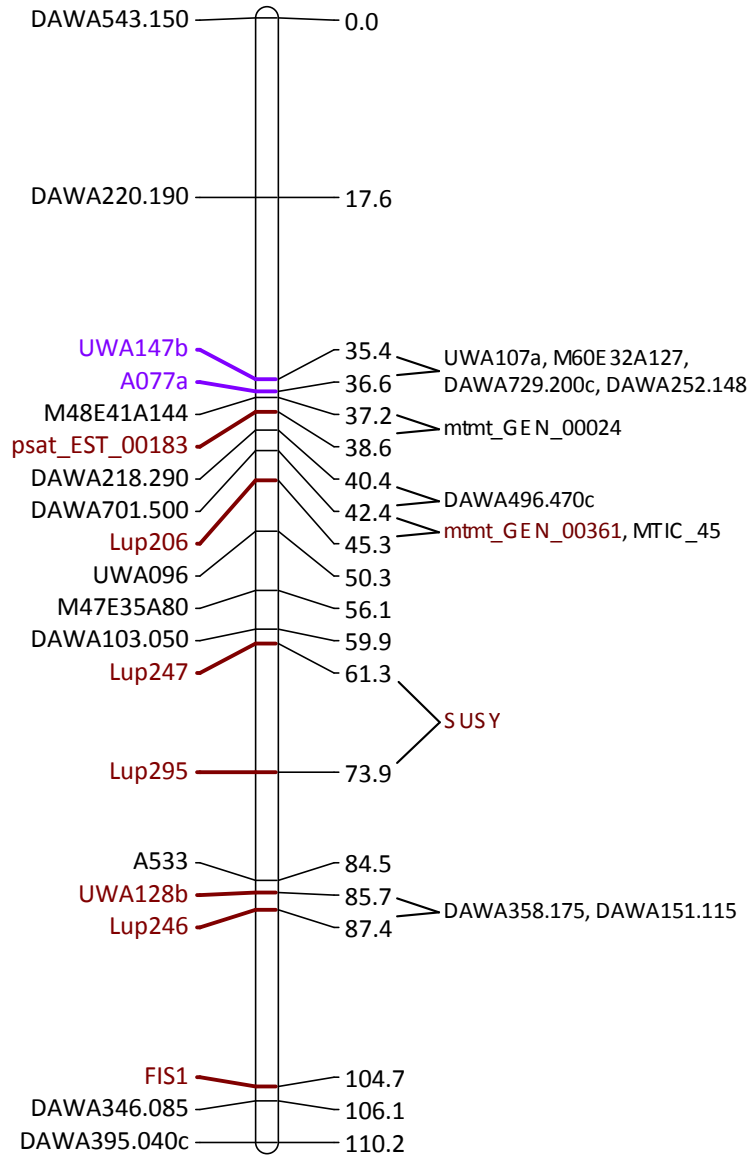

# NLL-13

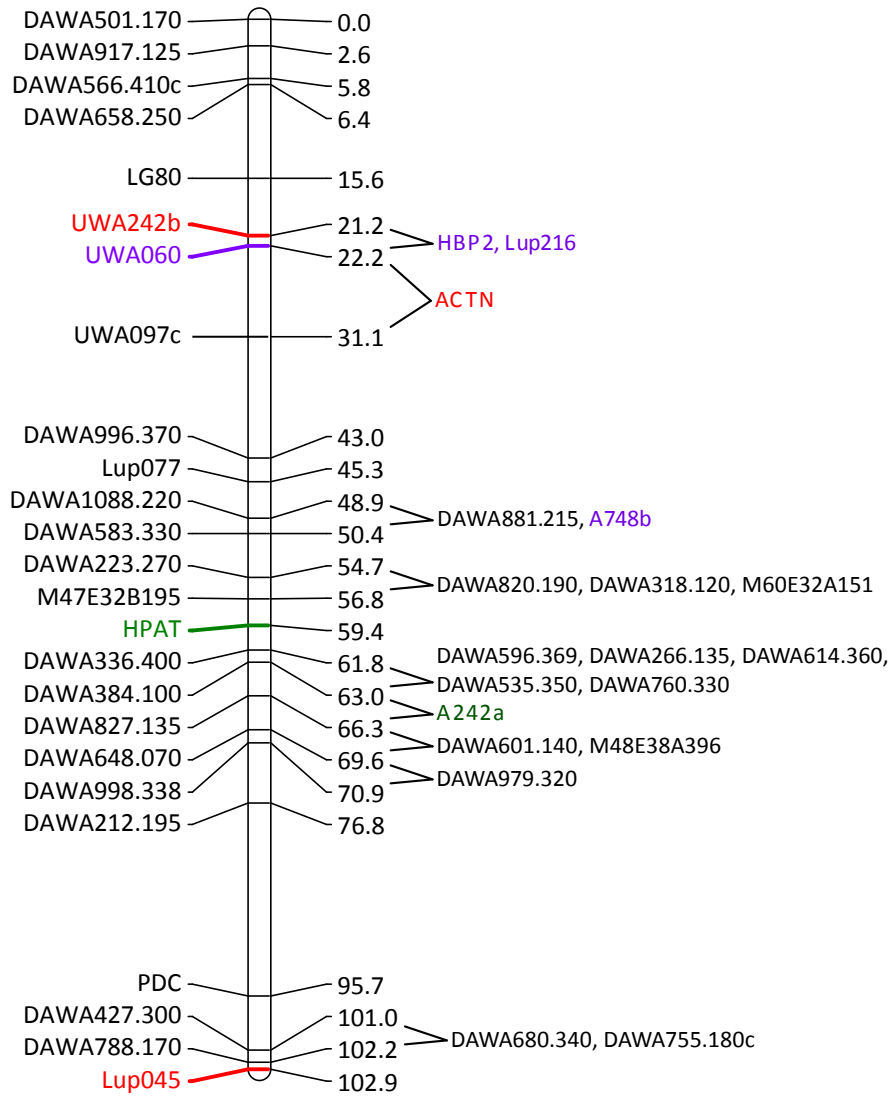

# NLL-14

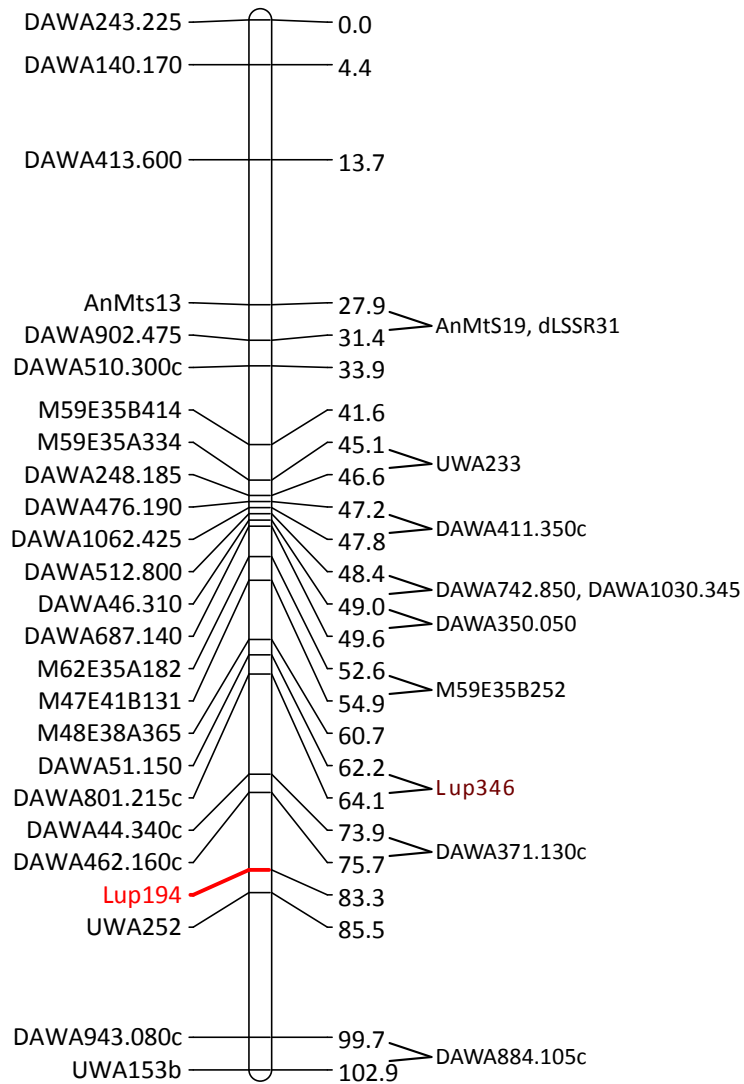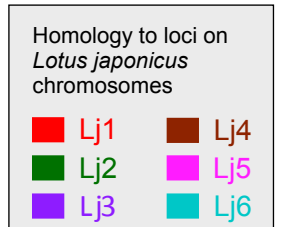

# NLL-15

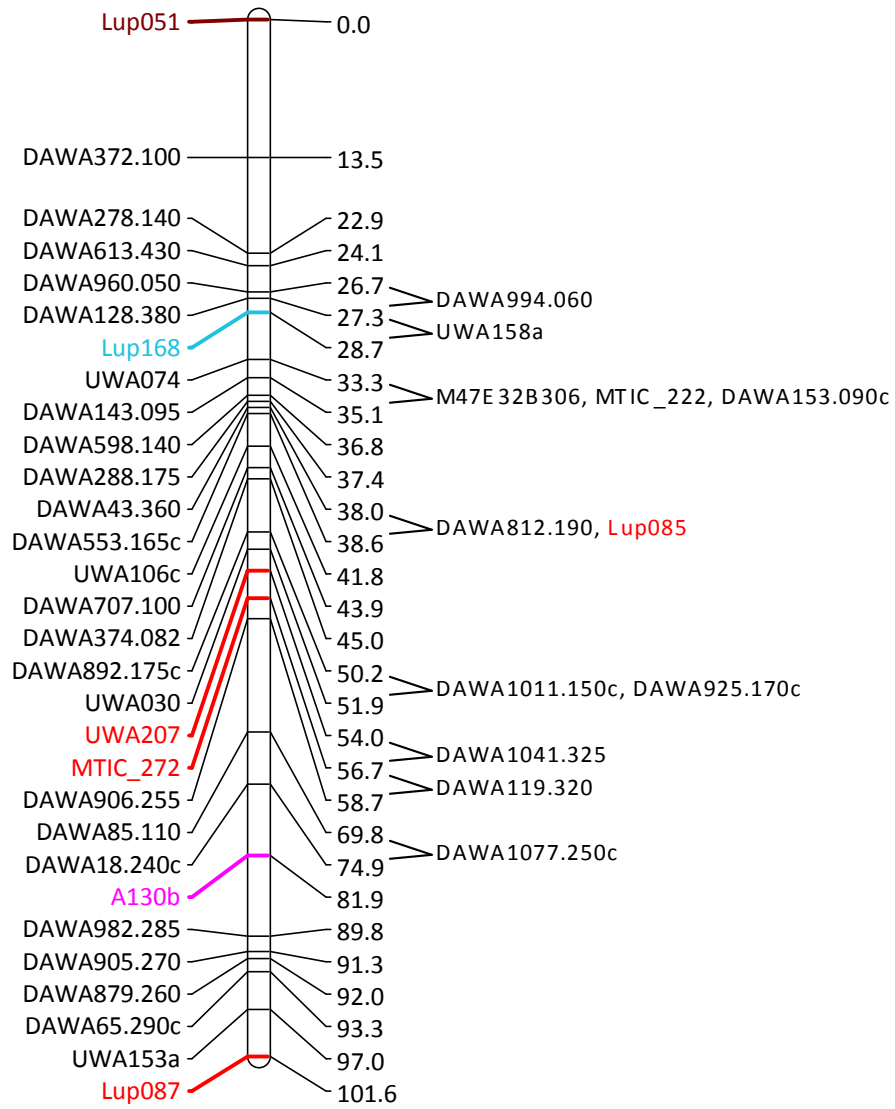



# NLL-16

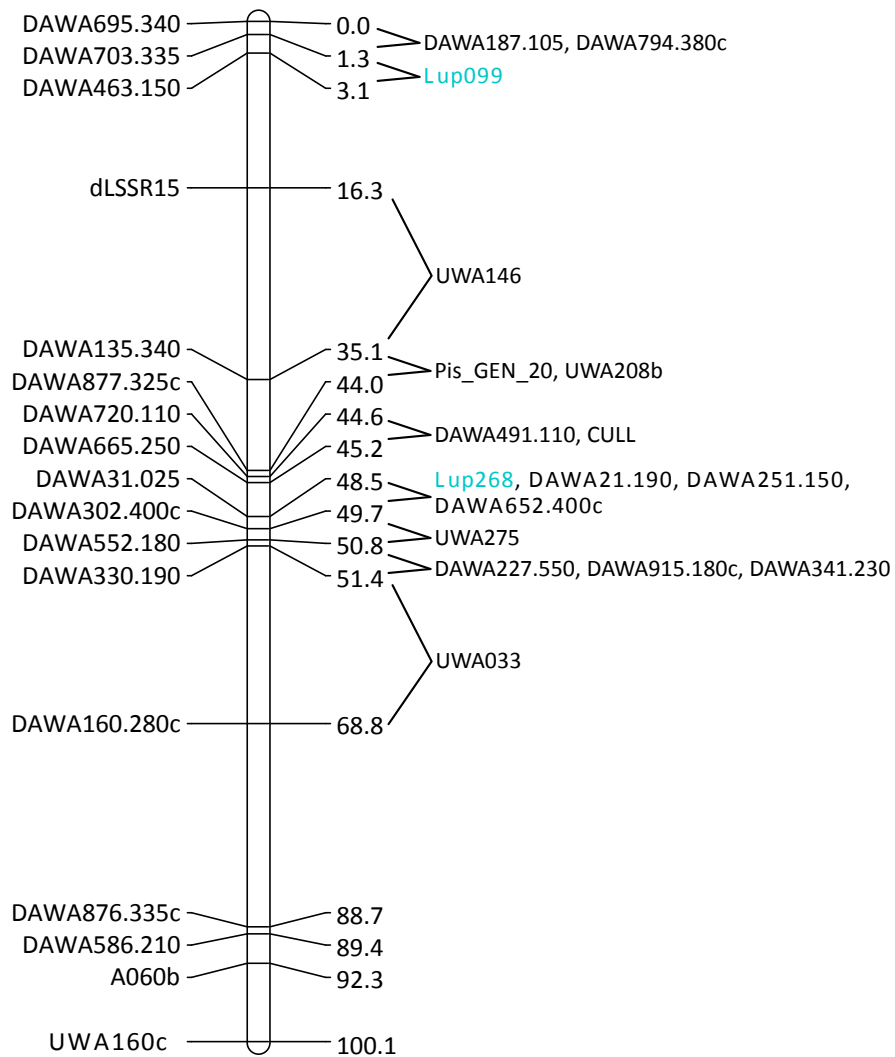

# NLL-17

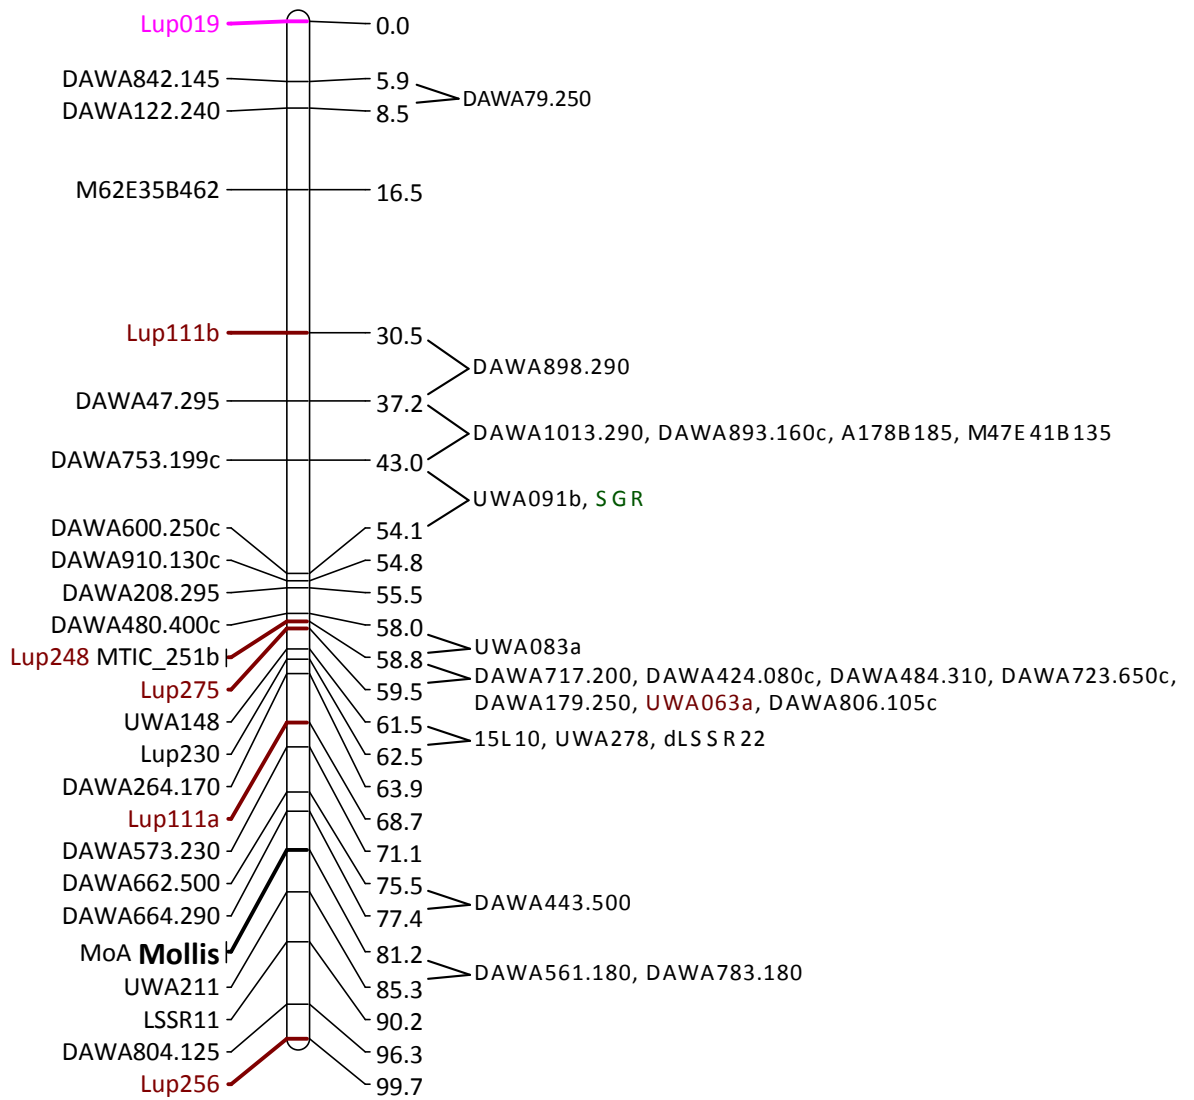

# NLL-18

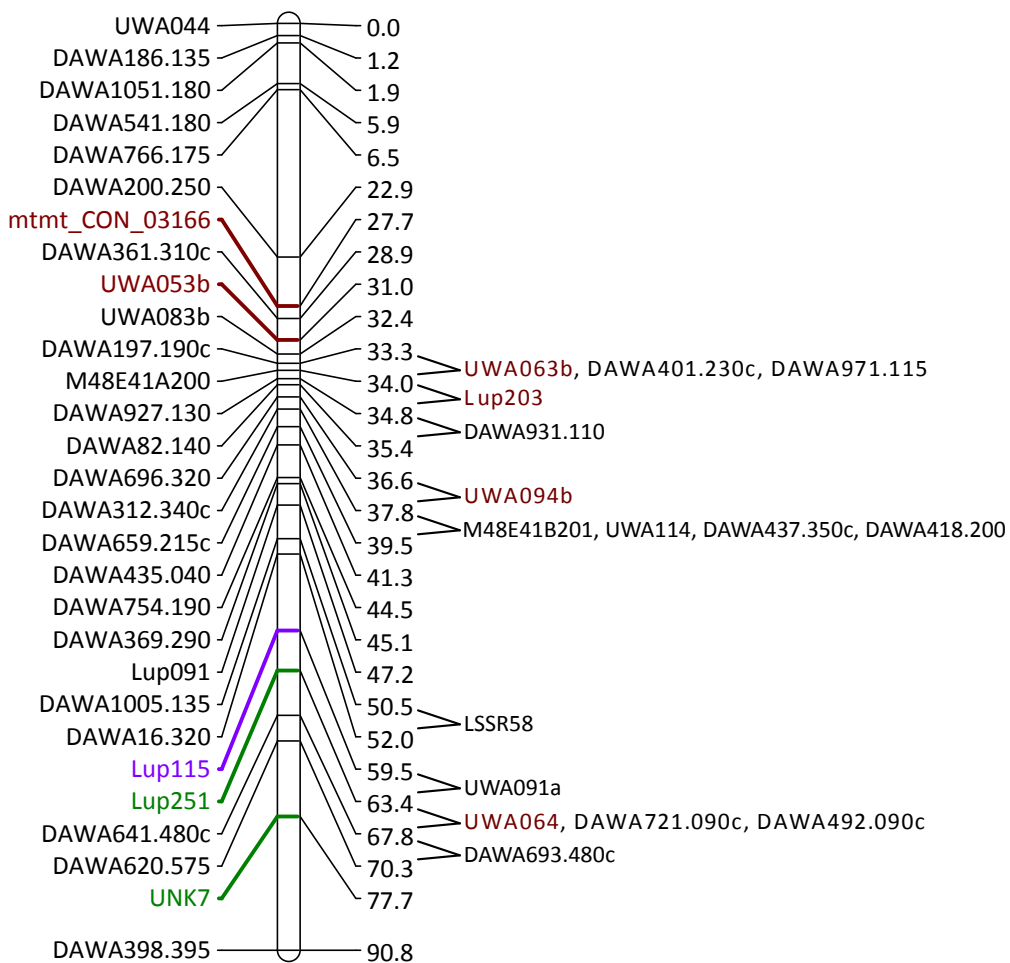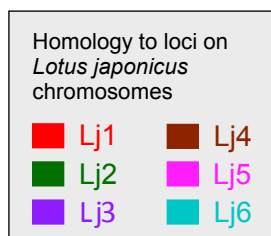

# NLL-19

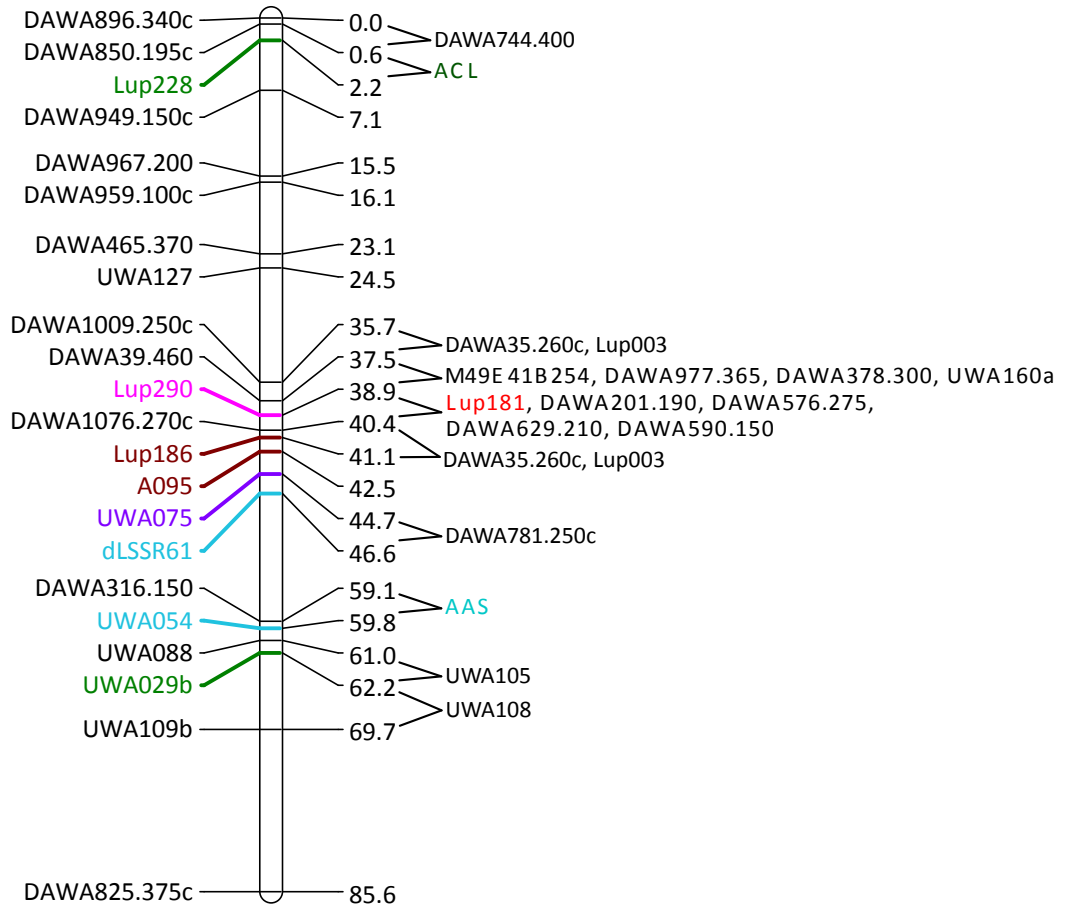

# NLL-20

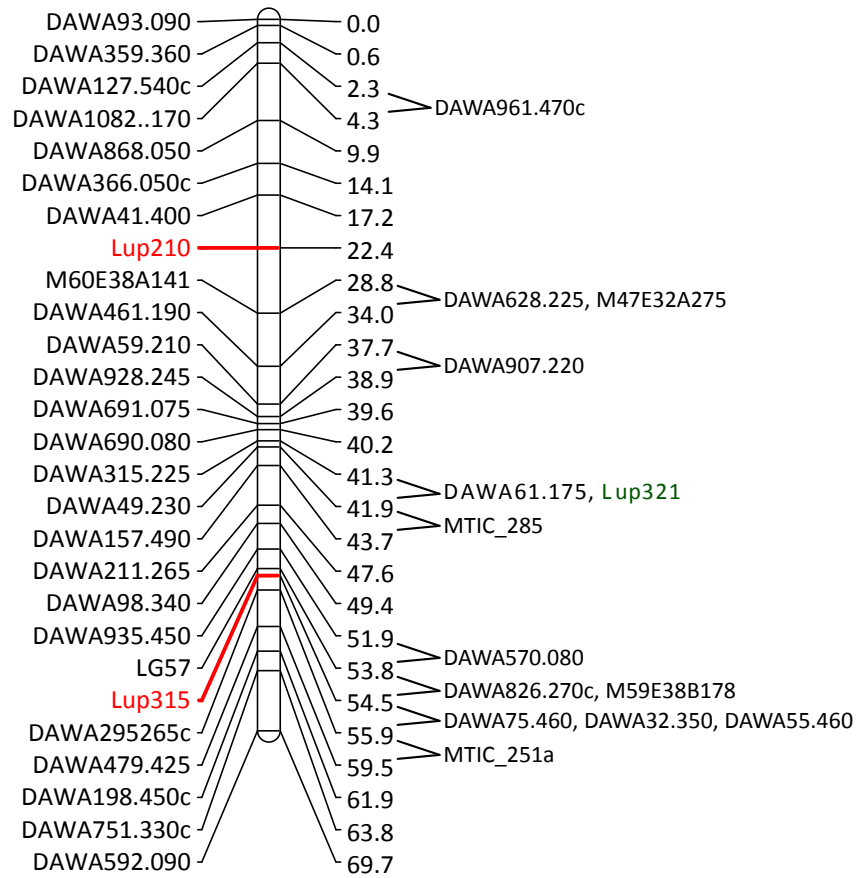

## Cluster-1

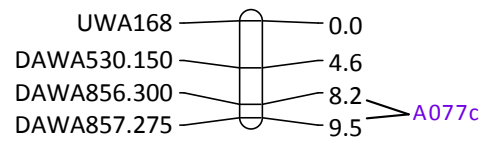

## Cluster-2

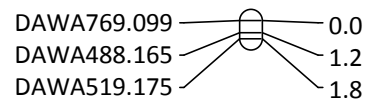

## Cluster-3

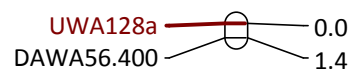

Homology to loci on  
*Lotus japonicus*  
chromosomes

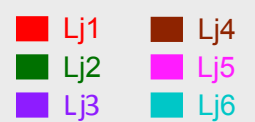

**Supplementary Table S1.** Simple sequence repeat (SSR) and amplified fragment length polymorphism (AFLP) primer combinations giving rise to microsatellite-anchored fragment length polymorphism (MFLP) markers in *Lupinus angustifolius*.

| SSR-<br>anchor<br>primers | AFLP <i>Mse</i> I-primers |      |      |      |      |      |      |      |      |      |      |      |      |      |      |      |
|---------------------------|---------------------------|------|------|------|------|------|------|------|------|------|------|------|------|------|------|------|
|                           | -CAA                      | -CAG | -CAC | -CAT | -CGA | -CGG | -CGC | -CGT | -CCA | -CCG | -CCC | -CCT | -CTA | -CTG | -CTC | -CTT |
| MF128                     | 14 <sup>1</sup>           | 25   | 32   | 39   | 55   | 64   | 75   | 87   | 96   | 106  | 115  | 127  | 133  | 144  | 155  | 164  |
| MF129                     | 178                       | 188  | 191  | 198  | 204  | 211  | nil  | 216  | 221  | 227  | 234  | 240  | 246  | 254  | 262  | 269  |
| MF51                      | 281                       | 289  | 299  | 312  | 320  | 324  | 325  | 347  | 351  | 355  | 359  | 367  | 376  | 385  | 396  | 410  |
| MF42                      | 413                       | 421  | 425  | 436  | 443  | 444  | 451  | 461  | 464  | 474  | 478  | 493  | 503  | 507  | 512  | 520  |
| MF43                      | 527                       | 532  | 546  | 558  | 564  | 566  | 571  | 575  | 579  | 593  | 599  | 601  | 603  | 613  | 620  | 632  |
| MF62                      | 641                       | 644  | 649  | 657  | 661  | 670  | 678  | 686  | 692  | 701  | 709  | 723  | 733  | 738  | 742  | 747  |
| MF52                      | 748                       | 758  | 770  | 776  | 787  | 789  | 792  | 796  | 798  | 808  | 815  | 823  | 829  | 837  | 844  | 853  |
| MF11                      | 869                       | 873  | 885  | 895  | 902  | 912  | 920  | 928  | 935  | 945  | 951  | 961  | 973  | 976  | 988  | 995  |
| MF151                     | 1002                      | nil  | 1008 | 1012 | 1018 | 1021 | 1025 | 1027 | 1032 | 1038 | 1040 | 1047 | 1056 | 1058 | 1061 | 1068 |
| MF152                     | 1072                      | 1085 | 1089 | 1091 | nil  | nil  | 1094 | nil  | 1095 |      |      |      |      |      |      |      |

<sup>1</sup> Serial numbers denote the first scored polymorphic marker for that particular primer combination. MFLP marker names are prefixed by 'DAWA' followed by the serial numbers and amplicon sizes.
